# Supplementary material
Source: MDPI journal article supplement (https://www.mdpi.com/2071-1050/15/7/5820)
Supplement: s1 [file s1]

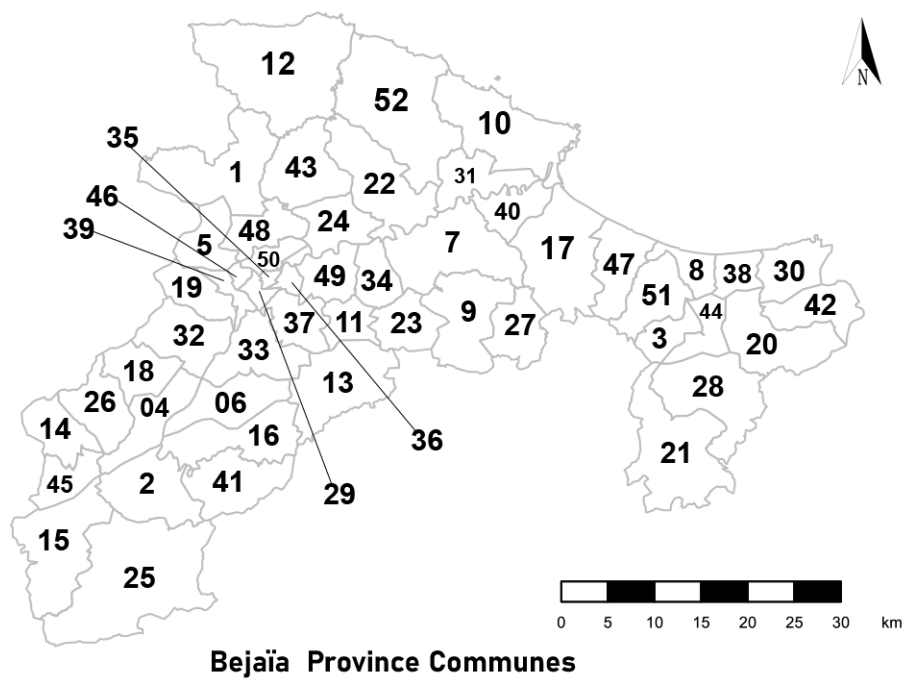

Figure S1. Distribution of the communes of Bejaïa province

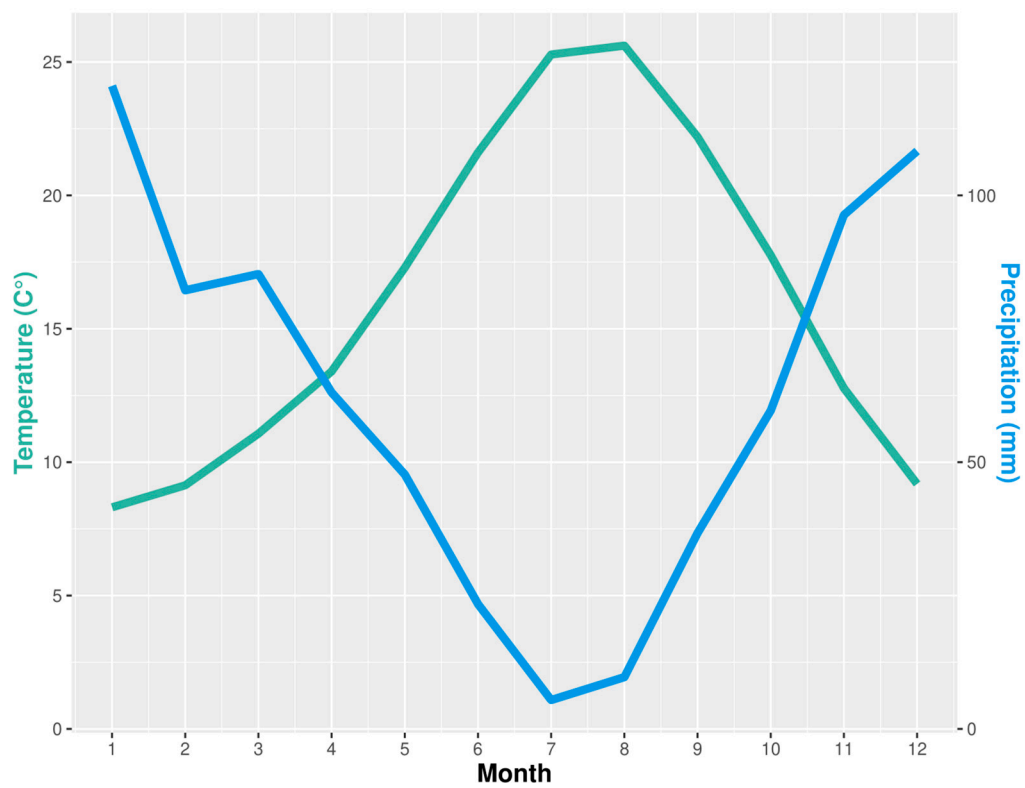

Figure S2. Visualizing precipitation and temperature patterns (2010-2018) within Bejaïa Province using an Umbrothermal Diagram
